# Supplementary material for: Polyvinylchloride-derived N, S co-doped carbon as an efficient sulfur host for high-performance Li–S batteries
Source: Royal Society of Chemistry journal article supplement (doi:10.1039/c8ra07885h), 2018-01-01
Supplement: c8ra07885h1.pdf [file c8ra07885h1.pdf]

## Supporting Information for

# **Polyvinylchloride-derived N, S-co-doped carbon as efficient sulfur host for high-performance Li-S battery**

Cejun Hu<sup>a</sup>, Yingna Chang<sup>a</sup>, Ruida Chen<sup>a</sup>, Jijin Yang<sup>a</sup>, Tianhui Xie<sup>a</sup>, Zheng Chang<sup>a</sup>, Guoxin Zhang<sup>\*b</sup>,  
Wen Liu<sup>\*a</sup>, and Xiaoming Sun<sup>a</sup>

a: State Key Laboratory of Chemical Resource Engineering, College of energy, Beijing Advanced  
Innovation Center for Soft Matter Science and Engineering, Beijing University of Chemical  
Technology, Beijing 100029, China

b: College of Electrical Engineering and Automation, Shandong University of Science and  
Technology, Qingdao 266590, China

E-mail: zhanggx@sdust.edu.cn; wenliu@mail.buct.edu.cn

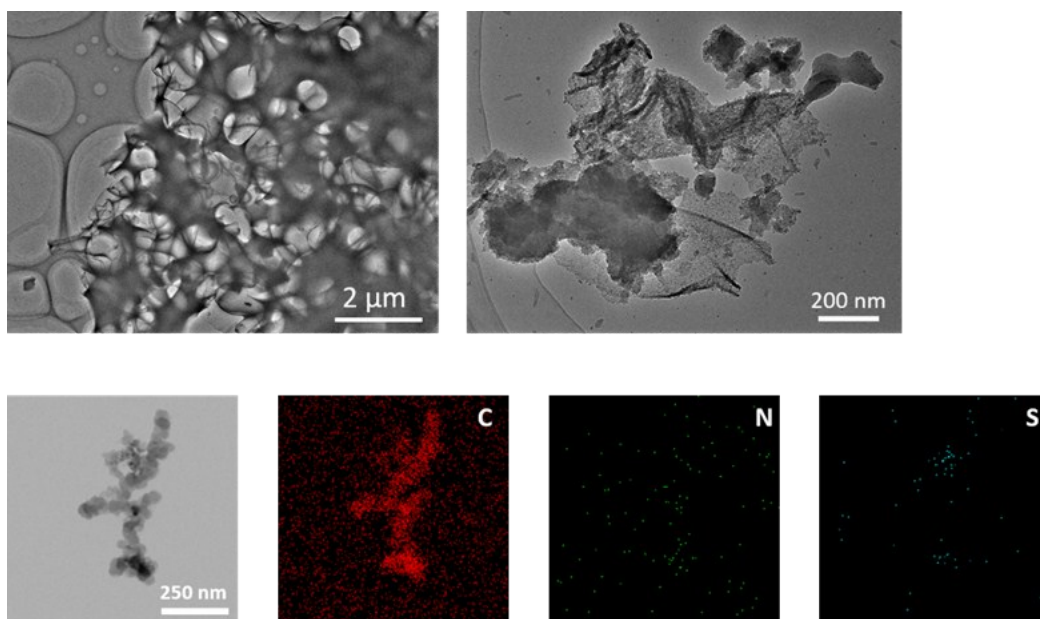

**Figure S1:** TEM images of A) NS-C, B) PC samples and C) Elemental mapping of C, N, S elements in NS-C sample.

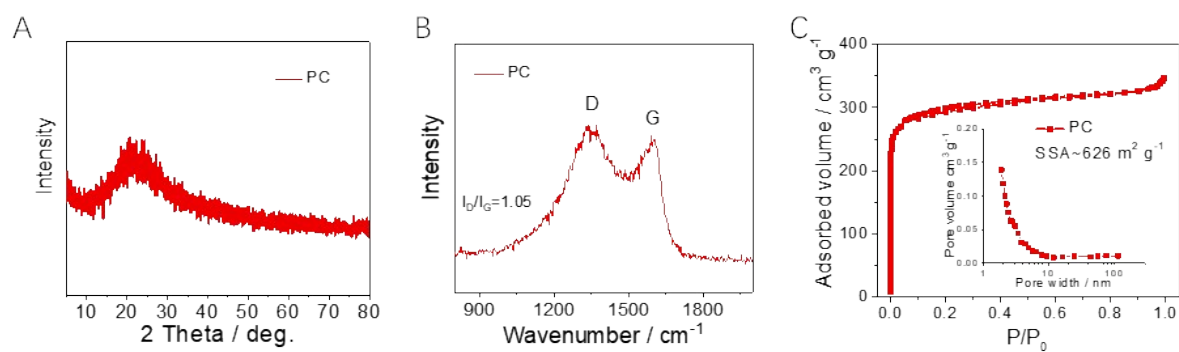

**Figure S2:** Physical properties of the PC sample. A) XRD pattern. B) Raman spectra and C) Pore size distribution of the NS-C samples.

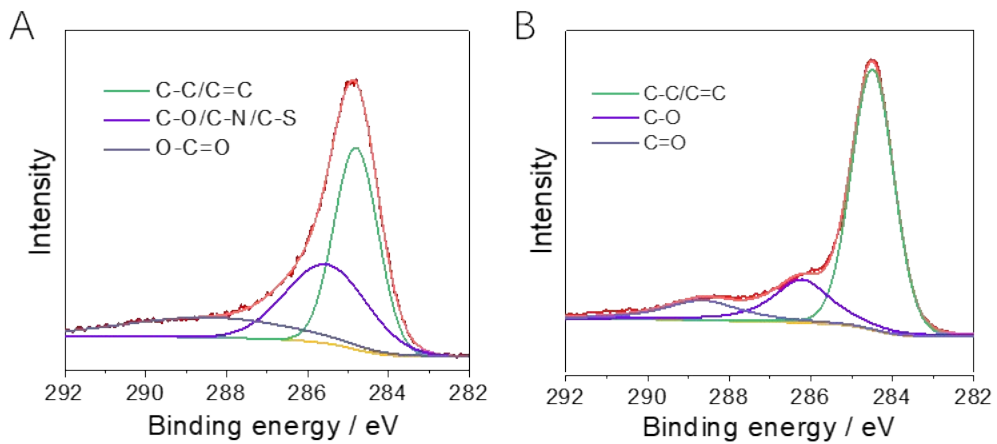

**Figure S3:** XPS surveys. A) C 1s XPS spectrum of NS-C. B) C 1s spectrum of PC sample.

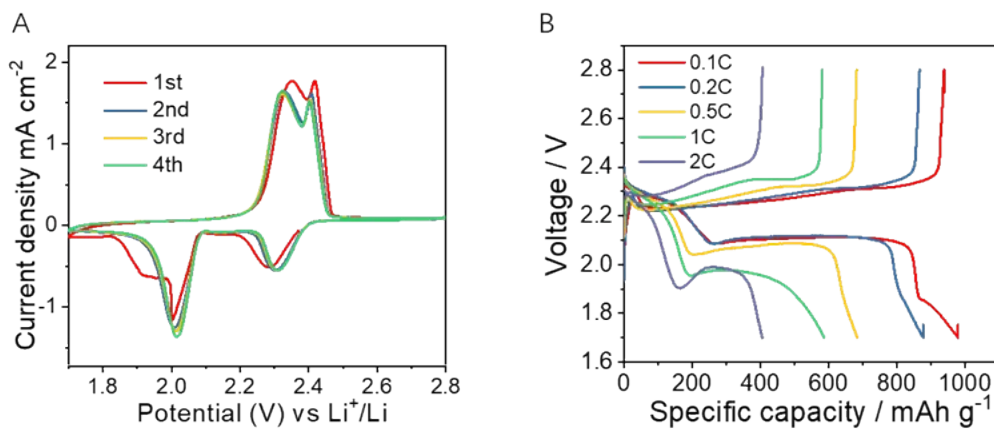

**Figure S4:** Elemental mapping of S in NS-C/S composite.

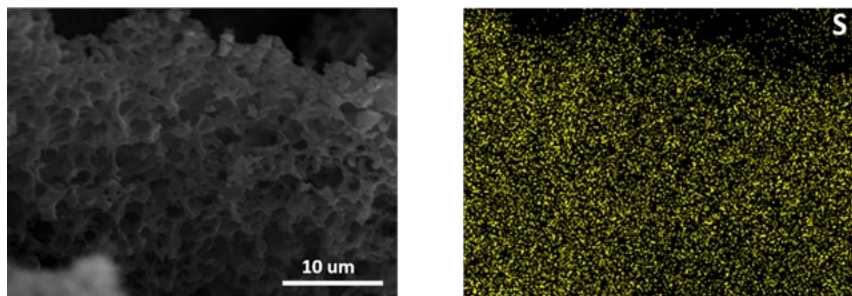

**Figure S5:** Electrochemical performance. A) CV curves of PC/S electrode. B) Discharge-charge profiles of PC/S electrode from 0.1C to 2C

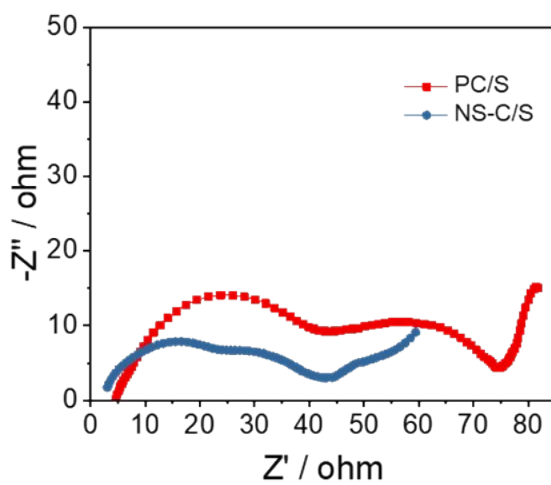

**Figure S6:** EIS patterns of sulfur electrodes of PC/S, and NS-C/S.

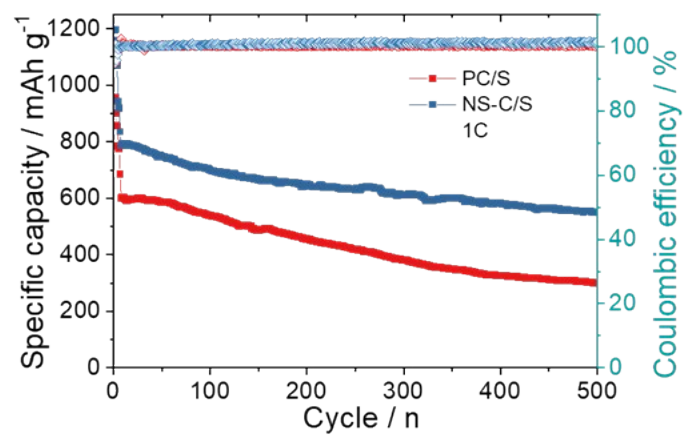

**Figure S7:** Long cycling performance and Coulombic efficiency of different sulfur electrodes at 1 C for 500 cycles
